# Supplementary material for: Comparative Transcriptome Profiling Analysis Uncovers Novel Heterosis-Related Candidate Genes Associated with Muscular Endurance in Mules
Source: PubMed Central journal article supplement (PMC7341310; doi:10.3390/ani10060980), 2020-06-04
Supplement: animals-10-00980-s001.pdf [file animals-10-00980-s001.pdf]

1 **Supporting information**

2 Additional supporting information may be found online in the supporting  
3 information tab for this article:

4 **Table S1** Number of pathways enriched by the DEGs and DAS Genes.

5 **Table S2** Table S2-1.xlsx: Pathways enriched in muscle, brain and skin tissues by DEGs  
6 and DAS genes that identified between mule and horse.

7 **Table S3** Table S3-1.xlsx: Pathways in muscle, brain and skin tissues by DEGs and  
8 DAS genes that identified between mule and donkey.

9 **Figure S1** The PCA of the brain, muscle, and skin tissues in horses, donkeys, mules  
10 and hinnies.

11 **Figure S2** The venn diagrams of differentially expressed genes among three tissues.

12 **Figure S3** Top 10 pathways enriched in muscle tissue by DEGs.

13 **Figure S4** Top 10 pathways enriched in brain tissue by DEGs.

14 **Figure S5** Top 10 pathways enriched in skin tissue by DEGs.

15 **Figure S6** The venn diagrams of differentially expressed genes and differentially  
16 spliced genes in brain, muscle, and skin tissues.

17 **Figure S7** Proportion of five splicing types of the DAS genes in three tissues.

18 **Figure S8** Top 10 pathways enriched in muscle tissue by DAS genes.

19 **Figure S9** Top 10 pathways enriched in brain tissue by DAS genes.

20 **Figure S10** Top 10 pathways enriched in skin tissue by DAS genes.

21 **Figure S11** Validation of DAS genes identified in the muscle tissues between mule and  
22 horse by the full-length transcriptome data generated from Pac-Bio sequencing  
23 platform.

24 **Figure S12** The result of transcriptome data mapping on the *TNNC2* gene among the  
25 muscle tissues of hinny, mule, donkey and horse.

26 **Figure S13** The result of transcriptome data mapping on the *RYR1* gene among the  
27 muscle tissues of hinny, mule, donkey and horse.

28

**Table S1** Number of pathways enriched by the DEGs and DAS Genes.

| Type      | Tissues | Mules vs horses | Mules vs donkeys | Hinnies vs horses | Hinnies vs horses |
|-----------|---------|-----------------|------------------|-------------------|-------------------|
| DEGs      | Muscle  | 1,030           | 84               | 778               | 979               |
|           | Brain   | 900             | 294              | 665               | 974               |
|           | Skin    | 1,045           | 458              | 798               | 850               |
| DAS genes | Muscle  | 564             | 79               | 503               | 621               |
|           | Brain   | 377             | 108              | 358               | 484               |
|           | Skin    | 289             | 85               | 381               | 341               |

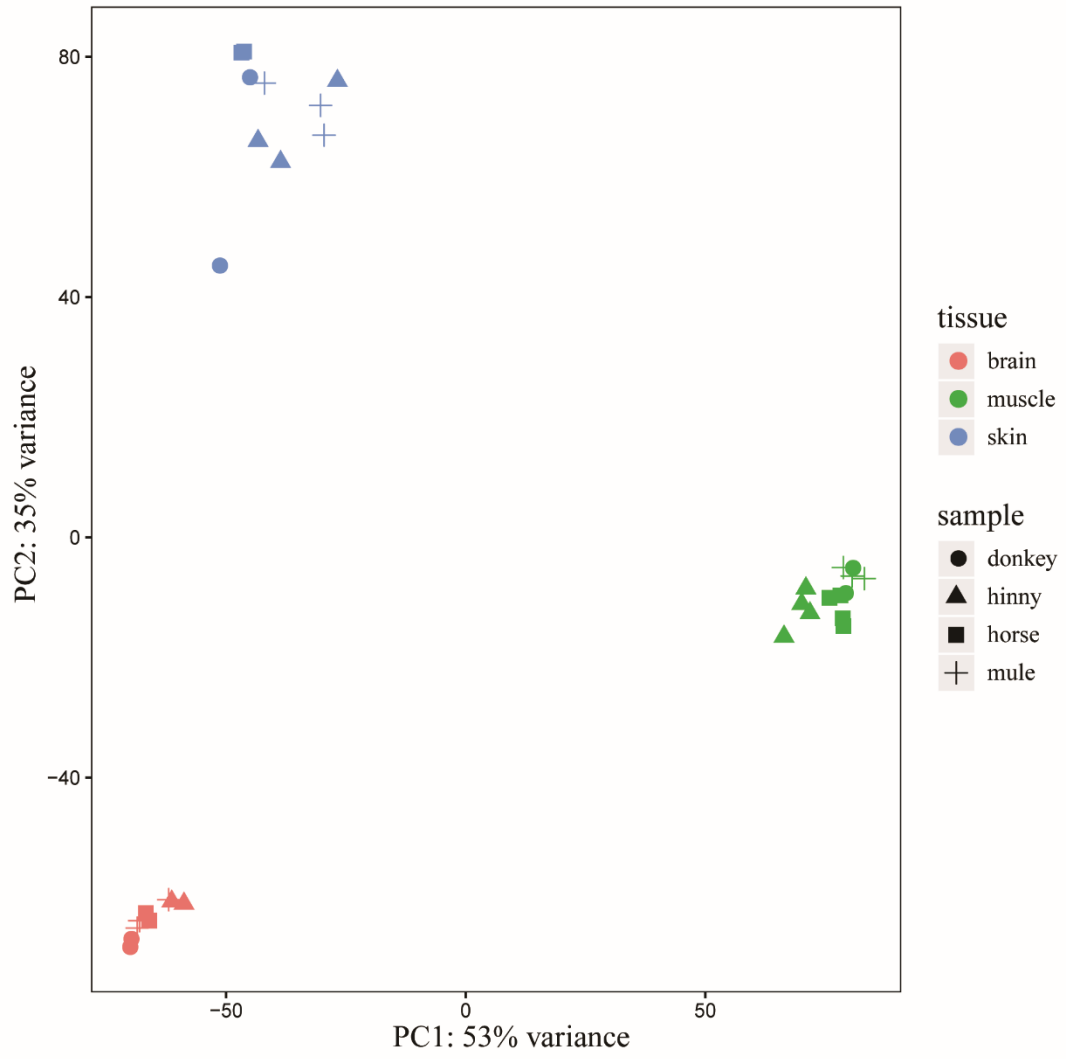

31  
32  
33

**Figure S1** The PCA of the brain, muscle, and skin tissues in horses, donkeys, mules and hinnies.

34

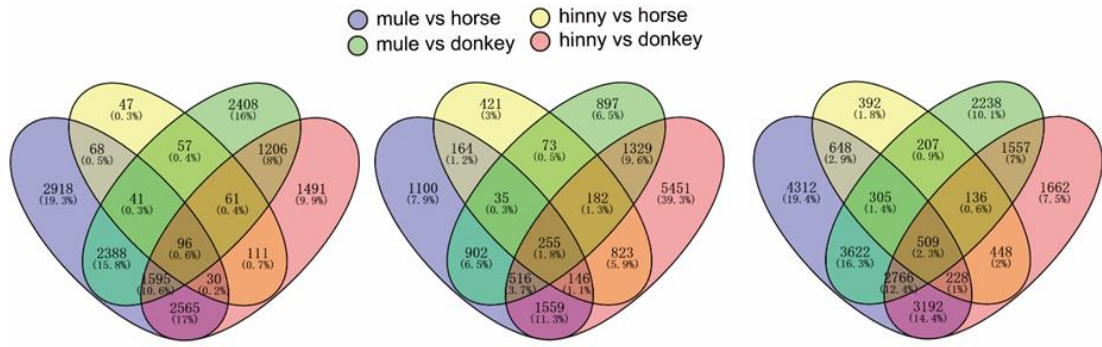

muscle

brain

skin

35

36

**Figure S2** The venn diagrams of differentially expressed genes among three tissues.

37

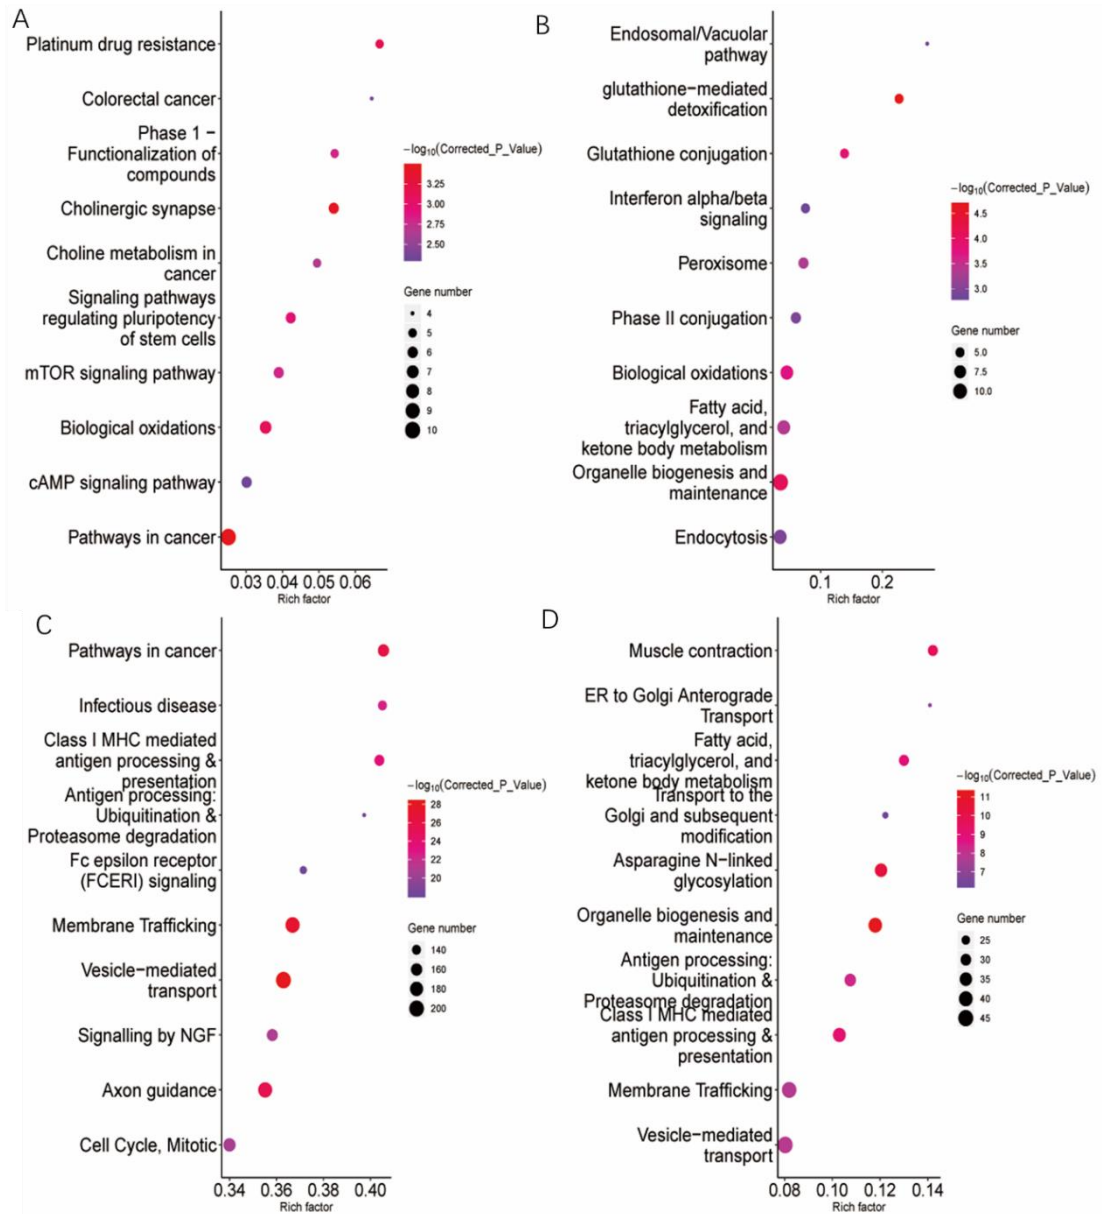

38  
 39 **Figure S3 Top 10 pathways enriched in muscle tissue by DEGs. A,** pathways enriched by  
 40 the DEGs between mule vs donkey. **B,** pathways enriched by the DEGs between mule vs horse. **C,**  
 41 pathways enriched by the DEGs between hinny vs donkey. **D,** pathways enriched by the DEGs  
 42 between hinny vs horse.

43  
 44  
 45  
 46  
 47  
 48

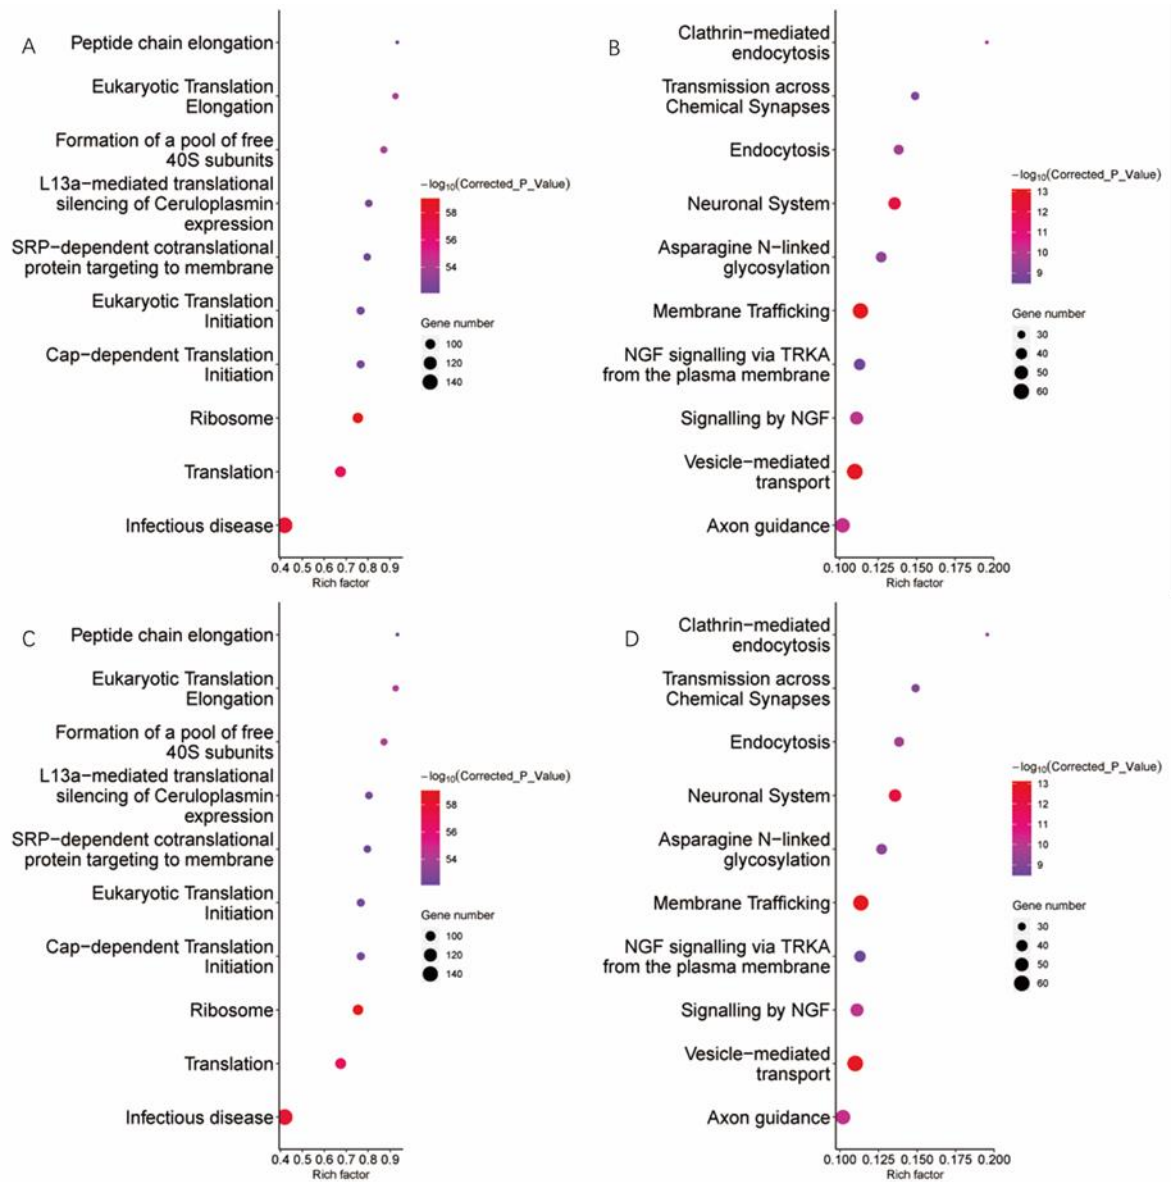

49

50

**Figure S4 Top 10 pathways enriched in brain tissue by DEGs. A,** pathways enriched by

51

the DEGs between mule vs donkey. **B,** pathways enriched by the DEGs between mule vs horse. **C,**

52

pathways enriched by the DEGs between hinny vs donkey. **D,** pathways enriched by the DEGs

53

between hinny vs horse.

54

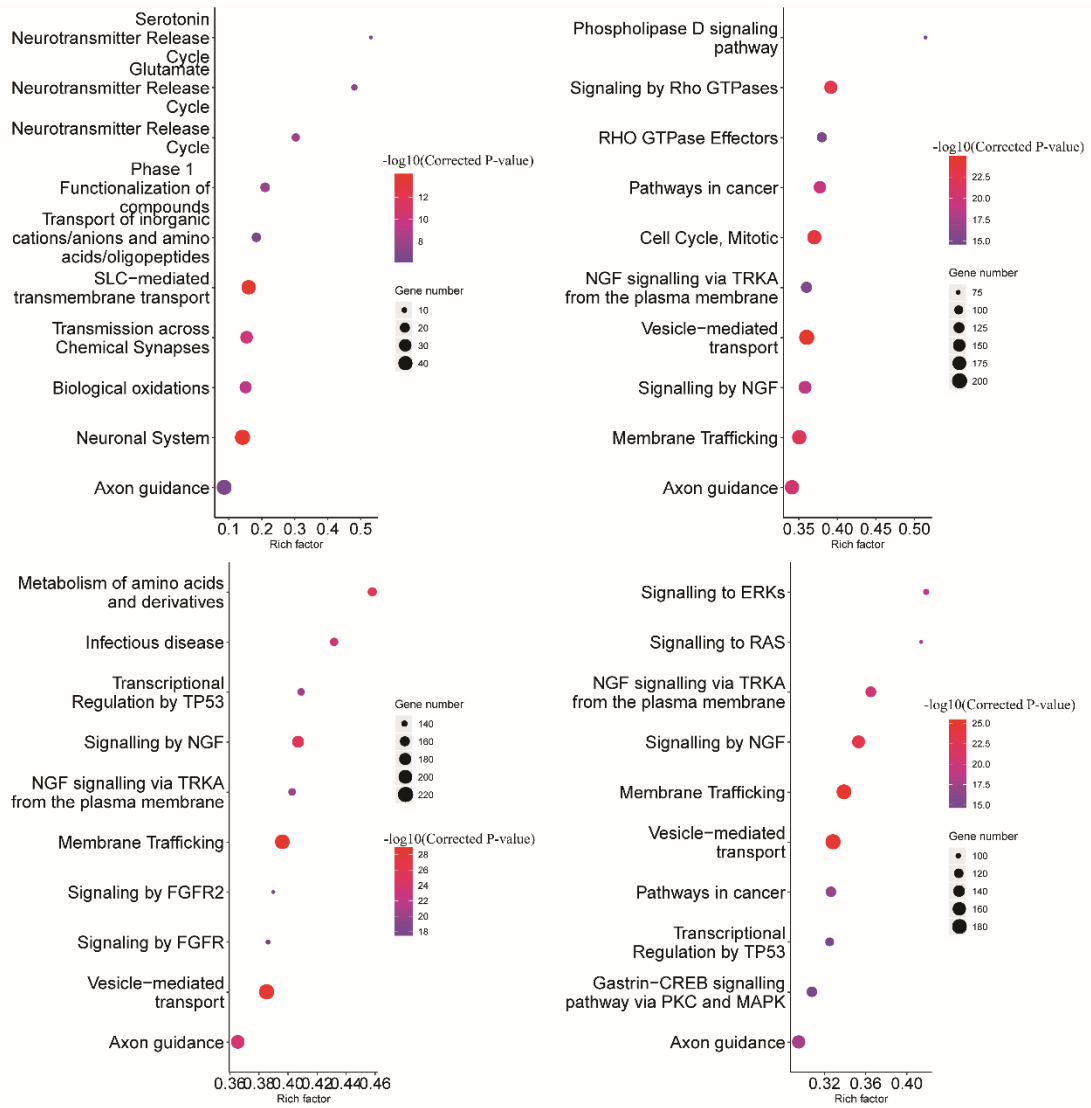

55

56

**Figure S5 Top 10 pathways enriched in skin tissue by DEGs. A,** pathways enriched by the

57

DEGs between mule vs donkey. **B,** pathways enriched by the DEGs between mule vs horse. **C,**

58

pathways enriched by the DEGs between hinny vs donkey. **D,** pathways enriched by the DEGs

59

between hinny vs horse.

60

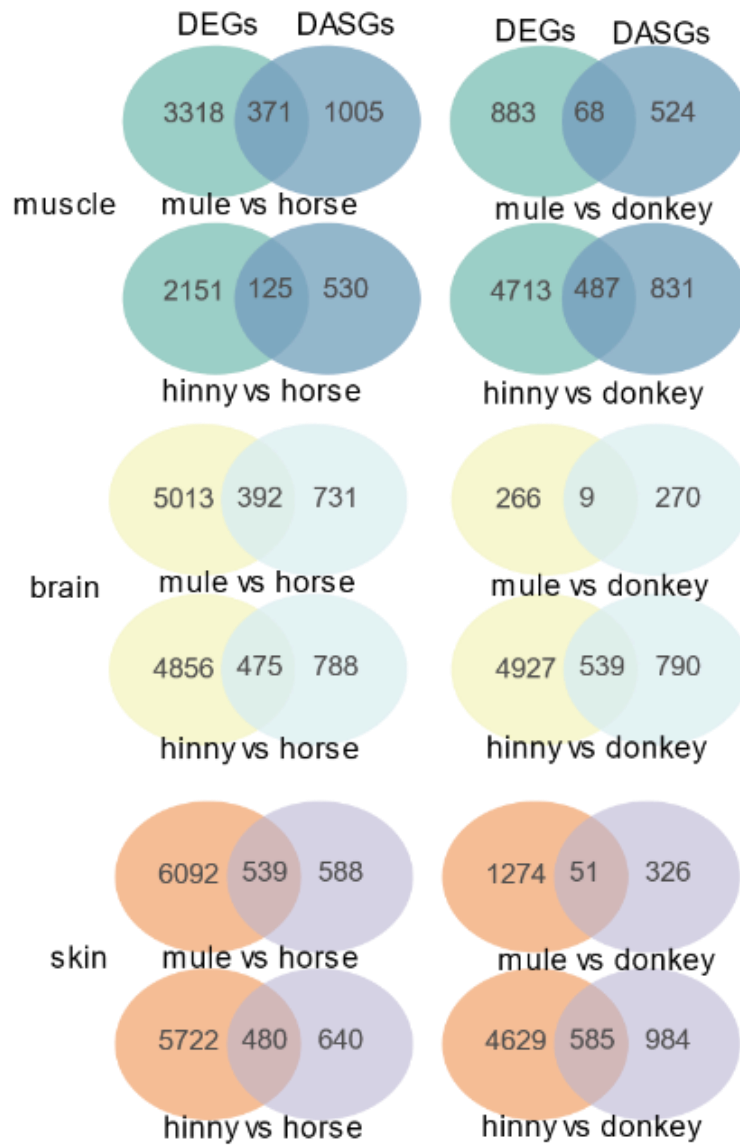

**Figure S6** The venn of differentially expressed genes and differentially spliced genes in brain, muscle, and skin tissues.



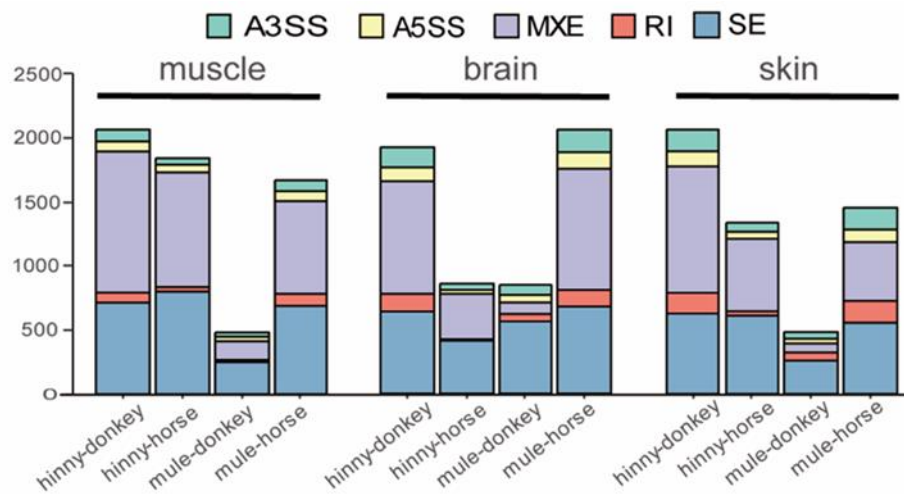

67

68

69

70

71

**Figure S7 Proportion of five splicing types of the DAS genes in three tissues. A3SS,**  
 Alternative acceptor site **A5SS**, Alternative donor site **MXE**, Mutually exclusive exons **RI**, Intron  
 retention **SE**, Exon skipping.

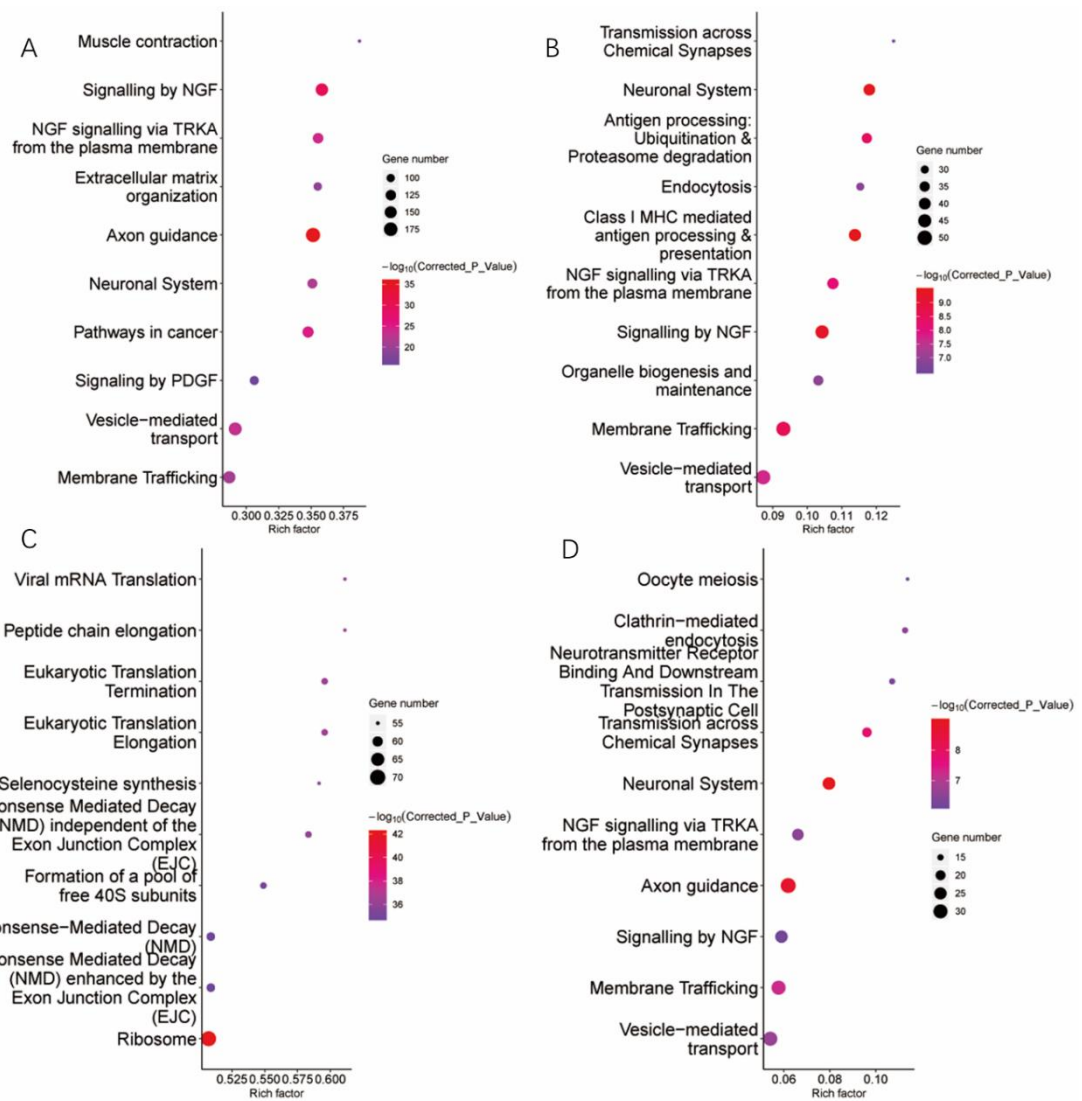

72

73

**Figure S8 Top 10 pathways enriched in muscle tissue by DAS genes. A,** pathways

74

enriched by the DAS genes between mule vs donkey. **B,** pathways enriched by the DAS genes

75

between mule vs horse. **C,** pathways enriched by the DAS genes between hinny vs donkey. **D,**

76

pathways enriched by the DAS genes between hinny vs horse.

77

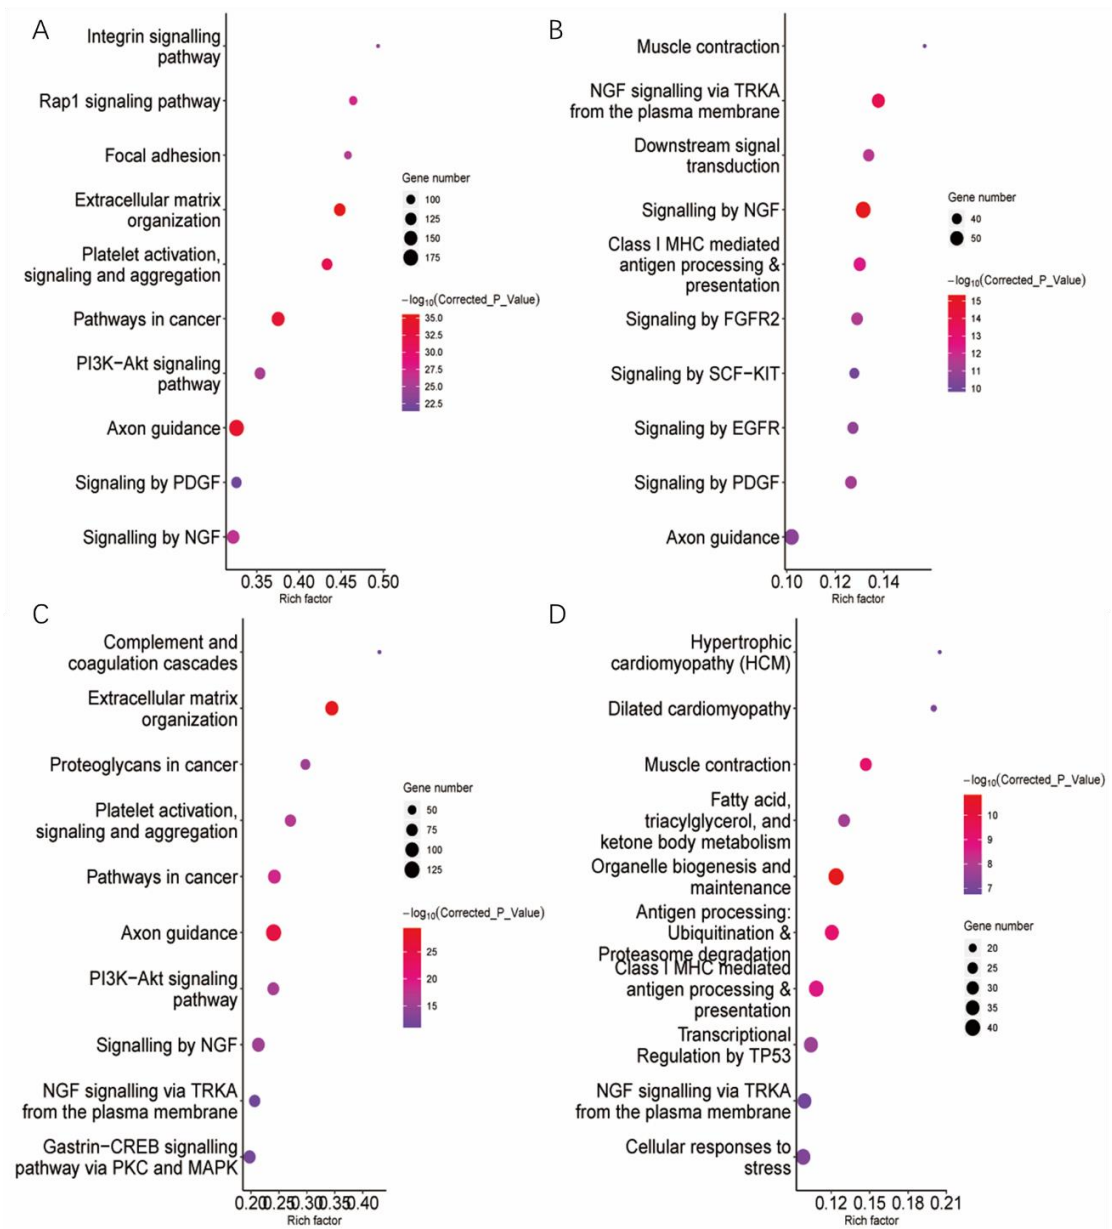

78

79

**Figure S9 Top 10 pathways enriched in brain tissue by DAS genes. A,** pathways enriched

80

by the DAS genes between mule vs donkey. **B,** pathways enriched by the DAS genes between

81

mule vs horse. **C,** pathways enriched by the DAS genes between hinny vs donkey. **D,** pathways

82

enriched by the DAS genes between hinny vs horse.

83

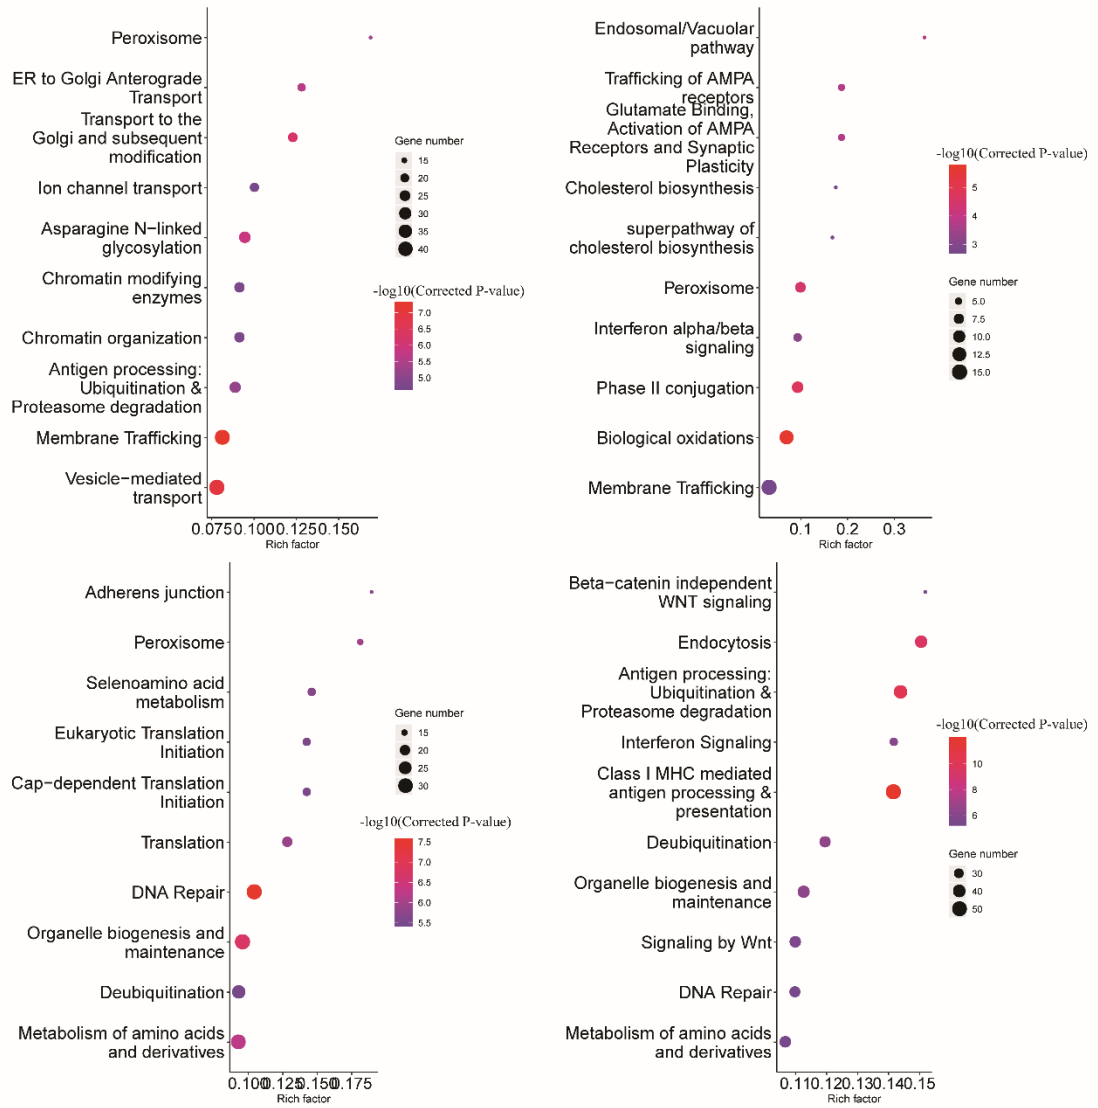

84  
85  
86  
87  
88  
89

**Figure S10 Top 10 pathways enriched in skin tissue by DAS genes. A,** pathways enriched by the DAS genes between mule vs donkey. **B,** pathways enriched by the DAS genes between mule vs horse. **C,** pathways enriched by the DAS genes between hinny vs donkey. **D,** pathways enriched by the DAS genes between hinny vs horse.

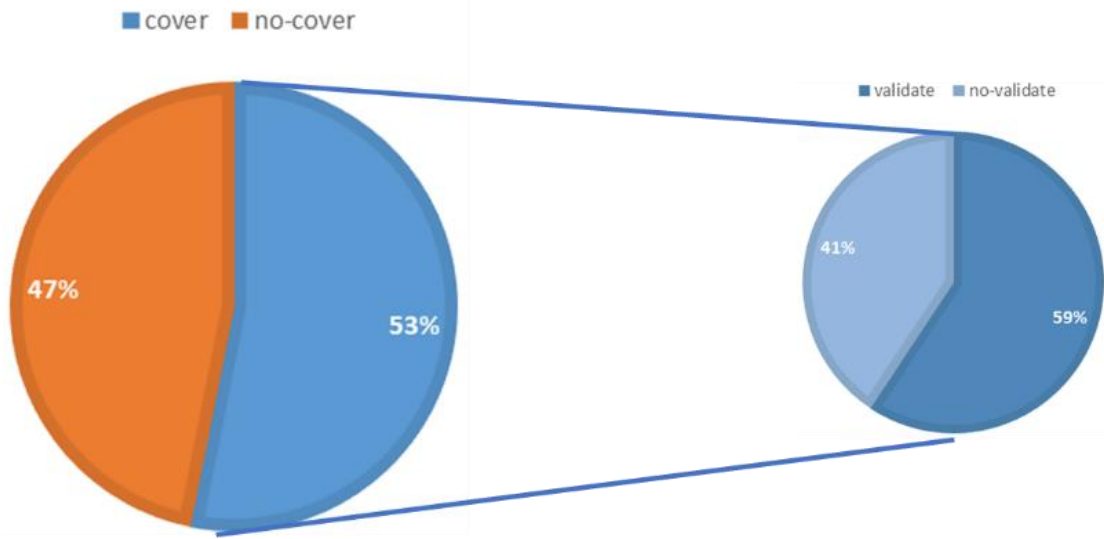

90  
91  
92  
93  
94  
95

**Figure S11** Validation of DAS genes identified in the muscle tissues between mule and horse by the full-length transcriptome data generated from Pac-Bio sequencing platform.

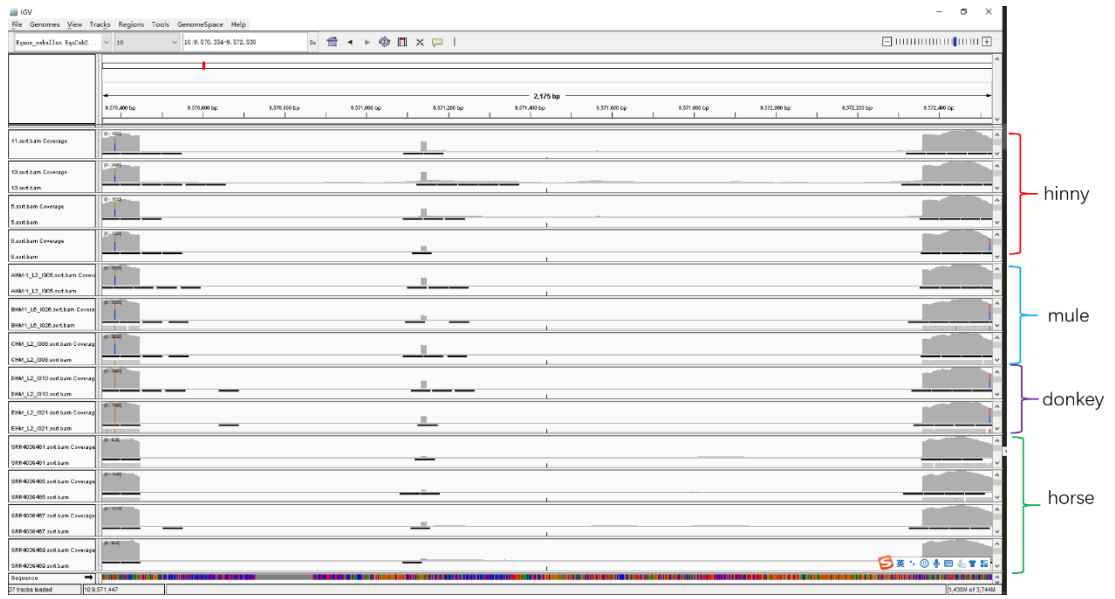

97

98

99

100

101

**Figure S12** The result of transcriptome data mapping on the *TNNC2* gene among the muscle tissues of hinny, mule, donkey and horse.

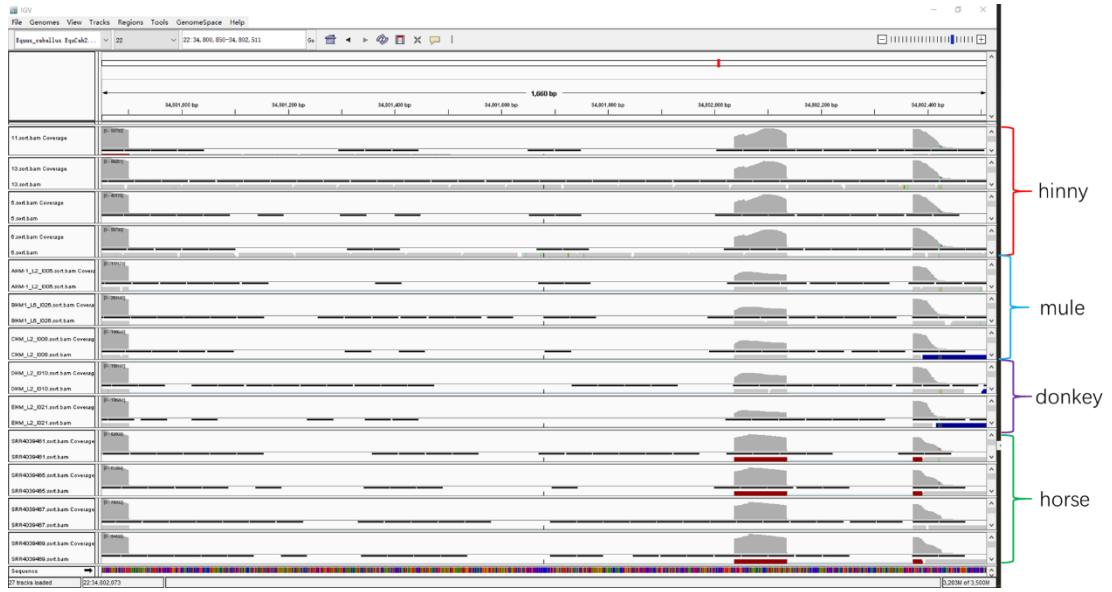

102  
103  
104  
105

**Figure S13** The result of transcriptome data mapping on the *RYR1* gene among the muscle tissues of hinny, mule, donkey and horse.
